# Supplementary material for: A Field-Deployable Reverse Transcription Recombinase Polymerase Amplification Assay for Rapid Detection of the Chikungunya Virus
Source: PubMed Central journal article supplement (PMC5042537; doi:10.1371/journal.pntd.0004953), 2016-09-29
Supplement: pntd.0004953.s001.pdf [file pntd.0004953.s001.pdf]

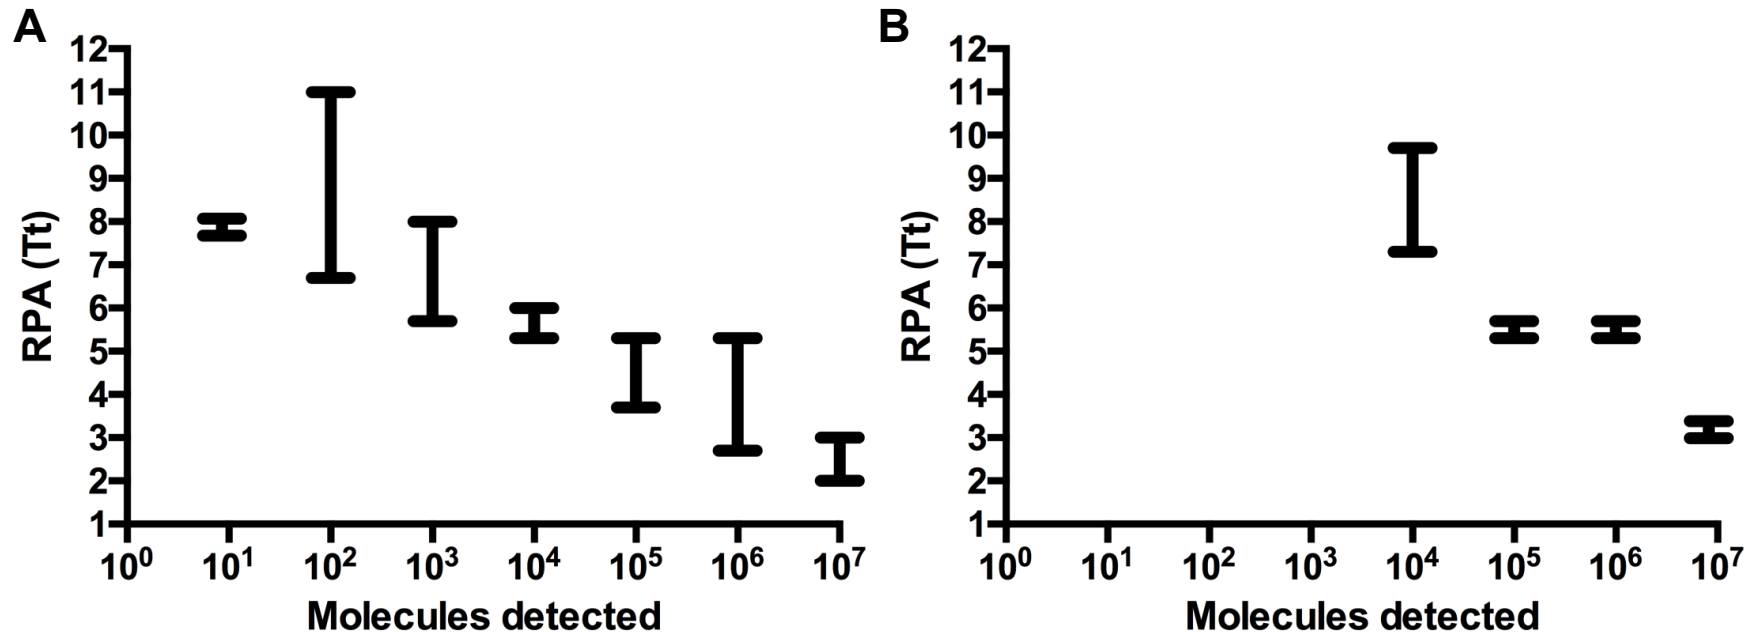

**S1 Fig. Reproducibility of CHIKV RPA assays employing the two primers combinations (A, RF+RR3; B, RF2+RR2).** The RPA assays were conducted eight times using 10-fold serial dilution of the RNA molecular standards. CHIKV RPA assay produced results between 2 to 12 minutes.  $10^7$ - $10^4$  RNA molecules were detected 8 out of 8 runs applying both primers combinations. RF+RR3 primers amplified  $10^3$ - $10^2$  copies 8 out of 8 times, while  $10^1$ , one out of eight times.  $10^3$ - $10^1$  RNA copies were not identified by the CHIKV RF2+RR2 RPA assay. The error bars represent the rang.
