# Supplementary material for: A Field-Deployable Reverse Transcription Recombinase Polymerase Amplification Assay for Rapid Detection of the Chikungunya Virus
Source: PubMed Central journal article supplement (PMC5042537; doi:10.1371/journal.pntd.0004953), 2016-09-29
Supplement: pntd.0004953.s002.pdf [file pntd.0004953.s002.pdf]

A

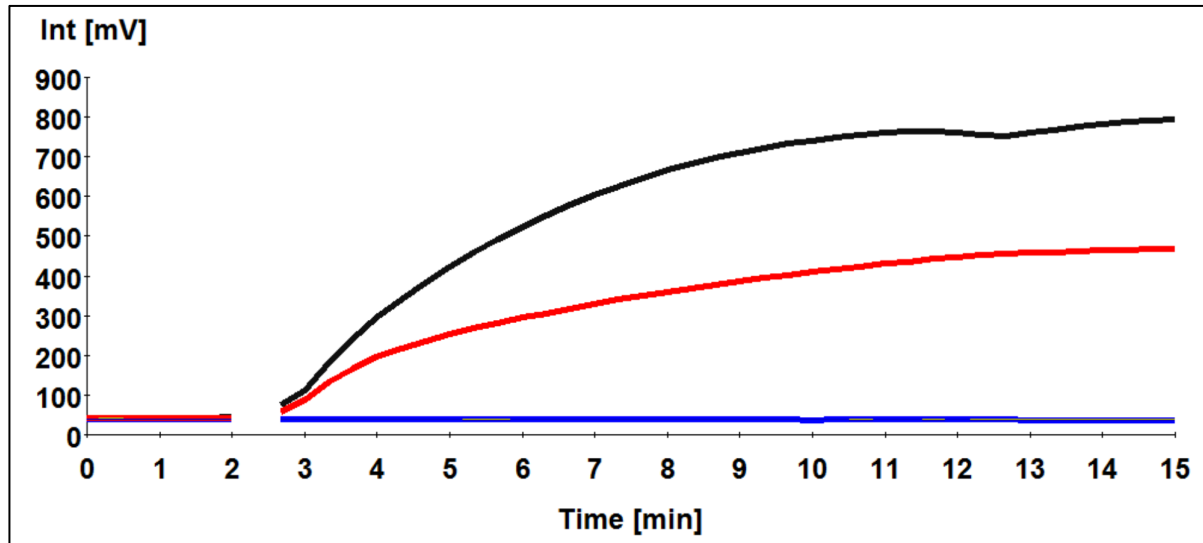

B

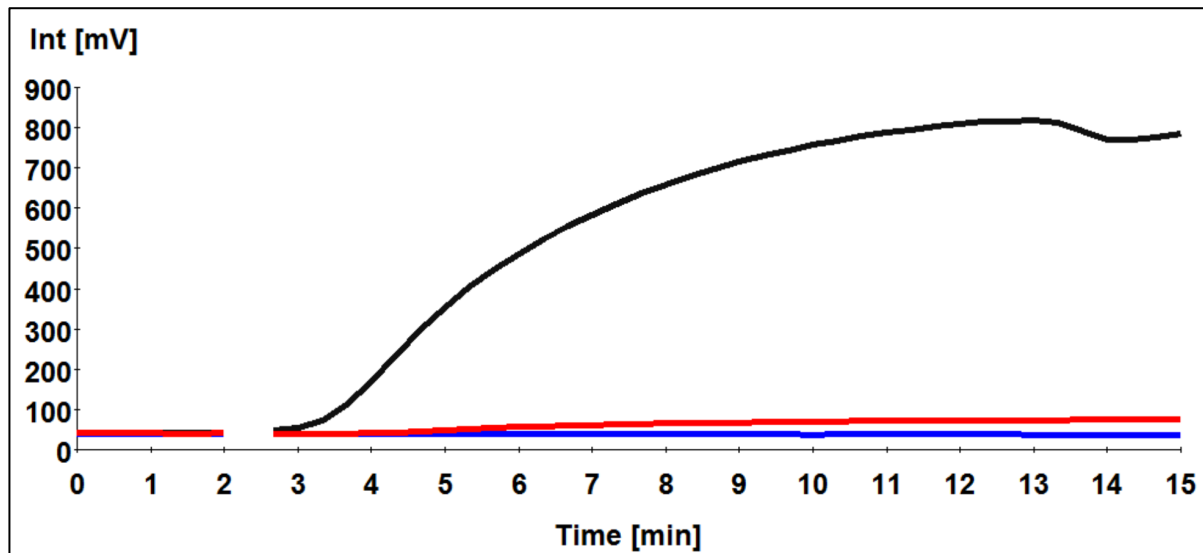

**S2 Fig.** Results of testing ChikV (black) and ONNV (Red) samples with RT-RPA assays with two primer pair combinations, A) RF+RR3 and (B) RF2+RR2. The RF+RR3 assay is more sensitive but is able to amplify the ONNV gene, while the RF+RR2 is less sensitive but did not detect the ONNV.
