# Supplementary material for: A Field-Deployable Reverse Transcription Recombinase Polymerase Amplification Assay for Rapid Detection of the Chikungunya Virus
Source: PubMed Central journal article supplement (PMC5042537; doi:10.1371/journal.pntd.0004953), 2016-09-29
Supplement: pntd.0004953.s003.pdf [file pntd.0004953.s003.pdf]

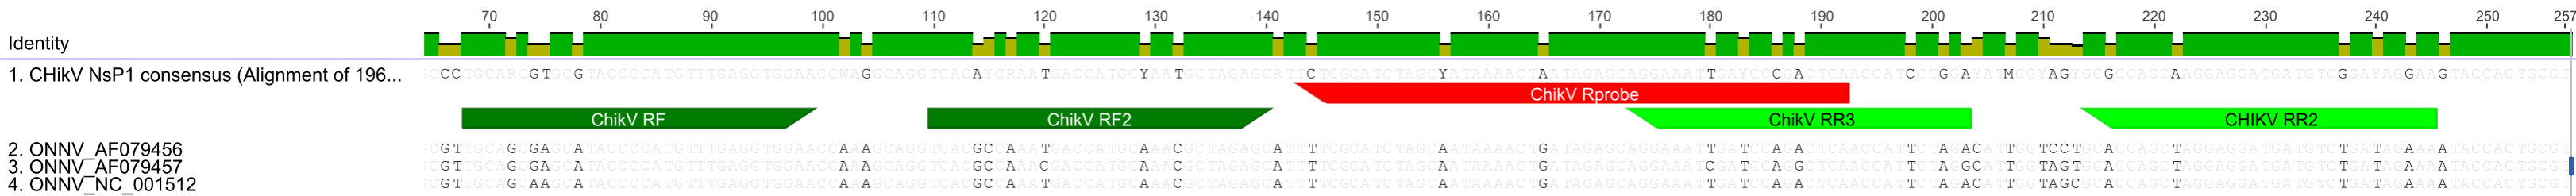

**S3 Fig. Alignment of Chikungunya RT-RPA primers and exo-probe sequences with the Chikungunya and O'nyong'nyong viruses sequence using GENEIOUS.**
