# Supplementary material for: A Field-Deployable Reverse Transcription Recombinase Polymerase Amplification Assay for Rapid Detection of the Chikungunya Virus
Source: PubMed Central journal article supplement (PMC5042537; doi:10.1371/journal.pntd.0004953), 2016-09-29
Supplement: pntd.0004953.s004.pdf [file pntd.0004953.s004.pdf]

**S1 Table. Determining the sensitivity of RT-RPA assay. Ten-fold serial dilutions of ChiKV isolates LR and In, were tested in both real-time RT-PCR and RT-RPA.**

| Dilutions        | In strain          |             | LR strain          |             |
|------------------|--------------------|-------------|--------------------|-------------|
|                  | Real-time PCR (Ct) | RT-RPA (Tt) | Real-time PCR (Ct) | RT-RPA (Tt) |
| 10 <sup>-2</sup> | 24.69              | 4           | 24.01              | 3.7         |
| 10 <sup>-3</sup> | 28.08              | 4.7         | 27.91              | 4.3         |
| 10 <sup>-4</sup> | 31.4               | 5           | 31.22              | 4.7         |
| 10 <sup>-5</sup> | 34.36              | 6           | 33.76              | 5.3         |
| 10 <sup>-6</sup> | 34.38              | 5.3         | 34.94              | 6.3         |

Ct: Cycle Threshold value of real-time RT-PCR; Tt: TimeThreshold value of RT-RPA in minutes.
