# Supplementary material for: A Field-Deployable Reverse Transcription Recombinase Polymerase Amplification Assay for Rapid Detection of the Chikungunya Virus
Source: PubMed Central journal article supplement (PMC5042537; doi:10.1371/journal.pntd.0004953), 2016-09-29
Supplement: pntd.0004953.s005.pdf [file pntd.0004953.s005.pdf]

|                          |     |                                                                                                                                                        |                        |
|--------------------------|-----|--------------------------------------------------------------------------------------------------------------------------------------------------------|------------------------|
| <b>TITLE OR ABSTRACT</b> |     | <b>A field-deployable reverse transcription recombinase polymerase amplification assay for rapid detection of the Chikungunya virus</b>                |                        |
|                          | 1   | Identification as a study of diagnostic accuracy using at least one measure of accuracy (such as sensitivity, specificity, predictive values, or AUC)  | 14-15                  |
| <b>ABSTRACT</b>          |     |                                                                                                                                                        |                        |
|                          | 2   | Structured summary of study design, methods, results, and conclusions (for specific guidance, see STARD for Abstracts)                                 | 2                      |
| <b>INTRODUCTION</b>      |     |                                                                                                                                                        |                        |
|                          | 3   | Scientific and clinical background, including the intended use and clinical role of the index test                                                     | 4-5                    |
|                          | 4   | Study objectives and hypotheses                                                                                                                        | 6                      |
| <b>METHODS</b>           |     |                                                                                                                                                        |                        |
| <i>Study design</i>      | 5   | Whether data collection was planned before the index test and reference standard were performed (prospective study) or after (retrospective study)     | 11-12                  |
| <i>Participants</i>      | 6   | Eligibility criteria                                                                                                                                   | 6-7                    |
|                          | 7   | On what basis potentially eligible participants were identified (such as symptoms, results from previous tests, inclusion in registry)                 | 6-7                    |
|                          | 8   | Where and when potentially eligible participants were identified (setting, location and dates)                                                         | 6-7                    |
|                          | 9   | Whether participants formed a consecutive, random or convenience series                                                                                | 6-7                    |
| <i>Test methods</i>      | 10a | Index test, in sufficient detail to allow replication                                                                                                  | 10-11                  |
|                          | 10b | Reference standard, in sufficient detail to allow replication                                                                                          | 9-10                   |
|                          | 11  | Rationale for choosing the reference standard (if alternatives exist)                                                                                  | 9-10                   |
|                          | 12a | Definition of and rationale for test positivity cut-offs or result categories of the index test, distinguishing pre-specified from exploratory         | 11                     |
|                          | 12b | Definition of and rationale for test positivity cut-offs or result categories of the reference standard, distinguishing pre-specified from exploratory | 10                     |
|                          | 13a | Whether clinical information and reference standard results were available to the performers/readers of the index test                                 | 11-12                  |
|                          | 13b | Whether clinical information and index test results were available to the assessors of the reference standard                                          | 11-12                  |
| <i>Analysis</i>          | 14  | Methods for estimating or comparing measures of diagnostic accuracy                                                                                    | 11-12                  |
|                          | 15  | How indeterminate index test or reference standard results were handled                                                                                | 11-12                  |
|                          | 16  | How missing data on the index test and reference standard were handled                                                                                 | 11-12                  |
|                          | 17  | Any analyses of variability in diagnostic accuracy, distinguishing pre-specified from exploratory                                                      | 11-12                  |
|                          | 18  | Intended sample size and how it was determined                                                                                                         | 6-7                    |
| <b>RESULTS</b>           |     |                                                                                                                                                        |                        |
| <i>Participants</i>      | 19  | Flow of participants, using a diagram                                                                                                                  | Supporting Information |
|                          | 20  | Baseline demographic and clinical characteristics of participants                                                                                      | 6-7                    |
|                          | 21a | Distribution of severity of disease in those with the target condition                                                                                 | 6-7                    |
|                          | 21b | Distribution of alternative diagnoses in those without the target condition                                                                            | 14-15                  |
|                          | 22  | Time interval and any clinical interventions between index test and reference standard                                                                 | 14-15                  |
| <i>Test results</i>      | 23  | Cross tabulation of the index test results (or their distribution) by the results of the reference standard                                            | 15, Fig 4              |
|                          | 24  | Estimates of diagnostic accuracy and their precision (such as 95% confidence intervals)                                                                | 15, Fig 4              |
|                          | 25  | Any adverse events from performing the index test or the reference standard                                                                            | NA                     |
| <b>DISCUSSION</b>        |     |                                                                                                                                                        |                        |
|                          | 26  | Study limitations, including sources of potential bias, statistical uncertainty, and generalisability                                                  | 16-17                  |
|                          | 27  | Implications for practice, including the intended use and clinical role of the index test                                                              | 18                     |
| <b>OTHER INFORMATION</b> |     |                                                                                                                                                        |                        |
|                          | 28  | Registration number and name of registry                                                                                                               | NA                     |
|                          | 29  | Where the full study protocol can be accessed                                                                                                          | 6-12                   |

NA: non-applicable
