# Supplementary material for: A Field-Deployable Reverse Transcription Recombinase Polymerase Amplification Assay for Rapid Detection of the Chikungunya Virus
Source: PubMed Central journal article supplement (PMC5042537; doi:10.1371/journal.pntd.0004953), 2016-09-29

**flow of participants through the study: A field-deployable reverse transcription recombinase polymerase amplification assay for rapid detection of the Chikungunya virus**

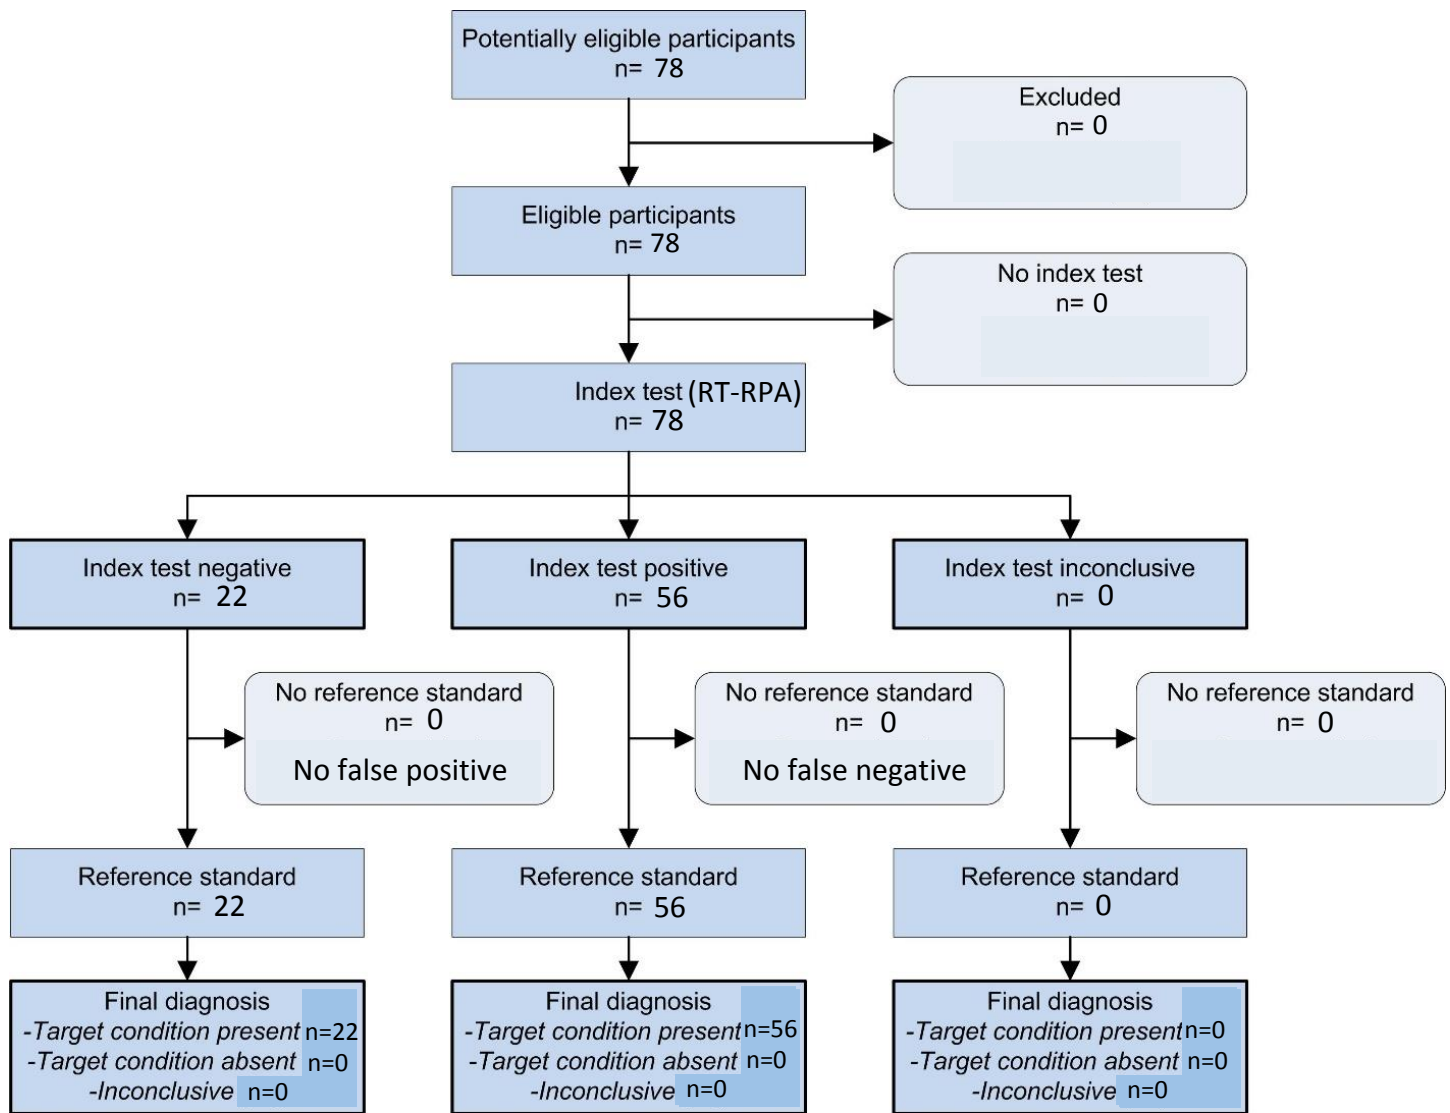

Supplement: pntd.0004953.s006.pdf [file pntd.0004953.s006.pdf]
