# Supplementary material for: A Field-Deployable Reverse Transcription Recombinase Polymerase Amplification Assay for Rapid Detection of the Chikungunya Virus
Source: PubMed Central journal article supplement (PMC5042537; doi:10.1371/journal.pntd.0004953), 2016-09-29
Supplement: pntd.0004953.s007.pdf [file pntd.0004953.s007.pdf]

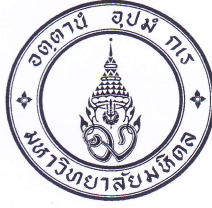

COA. No. MU-IRB 2010/251.3108

**Documentary Proof of Mahidol University Institutional Review Board**

**Title of Project:** Host and Viral Determinants in Chikungunya Virus-infected

**Principal Investigator:** Associate Professor Dr. Sukathida Ubol

**Co-investigators:** Mr. Weerawat Phuklia  
Miss Jindarat Lohachanakul

**Name of Institution:** Faculty of Science

**Approval includes:** 1) MU-IRB Submission form version received date 31 August 2010  
2) Participant Information Sheet version date 26 August 2010  
3) Informed Consent form version date 29 June 2010

Mahidol University Institutional Review Board is in full compliance with International Guidelines for Human Research Protection such as Declaration of Helsinki, The Belmont Report, CIOMS Guidelines and the International Conference on Harmonization in Good Clinical Practice (ICH-GCP)

**Date of Approval:** 31 August 2010

**Date of Expiration:** 30 August 2011

**Signature of Chairman:** .....

Handwritten signature of Professor Shusee Visalyaputra in blue ink.

(Professor Shusee Visalyaputra)

**Signature of Head of the Institute:** .....

Handwritten signature of Associate Professor Samsanee Chaiyaraj in blue ink.

(Associate Professor Samsanee Chaiyaraj)  
Vice President for Research and Academic Affairs
